# Supplementary material for: Evolutionary and functional analysis of two‐component system in chickpea reveals CaRR13, a TypeB RR, as positive regulator of symbiosis
Source: PubMed Central journal article supplement (PMC8633487; doi:10.1111/pbi.13649), 2021-09-16
Supplement: PBI-19-2415-s002.pdf [file PBI-19-2415-s002.pdf]

**Supplemental Table 2: Distribution of TCS genes across various classes in the 3 legumes analysed in this study (marked by \*) and other plants**

| Species                      | HK | HPt | Type-A RR | Type-B RR | Type-C RR | Pseudo-RR | Total |
|------------------------------|----|-----|-----------|-----------|-----------|-----------|-------|
| <i>Cicer arietinum</i> *     | 19 | 8   | 10        | 16        | 9         | 5         | 67    |
| <i>Medicago truncatula</i> * | 21 | 8   | 11        | 35        | 12        | 9         | 96    |
| <i>Cajanus cajan</i> *       | 20 | 10  | 12        | 16        | 11        | 6         | 75    |
| <i>Arabidopsis thaliana</i>  | 8  | 6   | 10        | 12        | 2         | 9         | 47    |
| <i>Oryza sativa</i>          | 8  | 5   | 13        | 13        | 2         | 8         | 49    |
| <i>Lotus japonicus</i>       | 14 | 7   | 7         | 11        | 1         | 5         | 45    |
| <i>Glycine max</i>           | 21 | 13  | 18        | 15        | 3         | 13        | 83    |
| <i>Zea mays</i>              | 11 | 9   | 16        | 9         | 3         | 11        | 59    |
| <i>Physcomitrella patens</i> | 18 | 3   | 7         | 5         | 2         | 4         | 39    |
| <i>Brassica rapa</i>         | 11 | 8   | 21        | 17        | 4         | 15        | 76    |
| <i>Solanum lycopersicum</i>  | 20 | 6   | 7         | 23        | 1         | 8         | 65    |
| <i>Cucumis melo</i>          | 18 | 5   | 7         | 8         | 0         | 6         | 44    |
| <i>Triticum aestivum</i>     | 7  | 10  | 41        | 2         | 0         | 2         | 62    |
| <i>Cucumis sativus</i>       | 18 | 7   | 8         | 8         | 0         | 5         | 46    |
| <i>Citrullus lanatus</i>     | 19 | 6   | 8         | 10        | 1         | 5         | 49    |

**Further distribution of TCS members in the 3 legumes**

|                              | Cytokinin rec | Ethylene rec | Phytochrome receptor | AHK1 | CKI1 | CKI2 | HP | PHP | Type-A RR | Type-B RR | Type-C RR | Pseudo-RR | Total |
|------------------------------|---------------|--------------|----------------------|------|------|------|----|-----|-----------|-----------|-----------|-----------|-------|
| <i>Cicer arietinum</i> *     | 4             | 5            | 4                    | 2    | 2    | 2    | 6  | 2   | 10        | 16        | 9         | 5         | 67    |
| <i>Medicago truncatula</i> * | 5             | 6            | 3                    | 2    | 2    | 3    | 6  | 2   | 11        | 35        | 12        | 9         | 96    |
| <i>Cajanus cajan</i> *       | 4             | 6            | 4                    | 2    | 2    | 2    | 8  | 2   | 12        | 16        | 11        | 6         | 75    |

Supplemental Table 3A: A list of paralogs in chickpea, *Medicago* and *C. cajan* genome

| Ca_TCS | Ca_TCS | Ka     | Ks     | Ka/Ks       | MT_TCS | MT_TCS | Ka     | Ks     | Ka/Ks       |
|--------|--------|--------|--------|-------------|--------|--------|--------|--------|-------------|
| CaHK1  | CaHK16 | 0.1177 | 0.6406 | 0.183733999 | MTHK1  | MTHK13 | 0.1494 | 0.7407 | 0.201701094 |
| CaHK10 | CaHK3  | 0.1375 | 0.7002 | 0.196372465 | MTHK12 | MTHK20 | 0.1138 | 0.7157 | 0.15900517  |
| CaHK5  | CaHK6  | 0.3375 | 2.1854 | 0.154433971 | MTHK15 | MTHK19 | 0.1476 | 0.8078 | 0.182718495 |
| CaHK5  | CaHK13 | 0.1828 | 0.9816 | 0.186226569 | MTHK3  | MTHK4  | 0.169  | 0.8182 | 0.206550966 |
| CaHK7  | CaHK18 | 0.1013 | 0.6644 | 0.152468393 | MTHK5  | MTHK18 | 0.1745 | 0.7424 | 0.235048491 |
| CaHK8  | CaHK4  | 0.1039 | 0.5556 | 0.18700504  | MT-HP1 | MT-HP6 | 0.2152 | 0.6662 | 0.323026118 |
| CaHP1  | CaHP5  | 0.2888 | 0      |             | MT-HP2 | MT-HP3 | 0.325  | 0      |             |
| CaHP3  | CaHP2  | 0.1792 | 0.6691 | 0.267822448 | MT-HP6 | MT-HP7 | 0.0797 | 1.1673 | 0.068277221 |
| CaHP4  | CaHP6  | 0.1243 | 0.79   | 0.157341772 | MRR1   | MRR36  | 0.4126 | 1.5367 | 0.26849743  |
| CaPHP1 | CaPHP2 | 0.0928 | 0.9633 | 0.096335513 | MRR1   | MRR21  | 0.2134 | 0.5977 | 0.357035302 |
| CaPRR3 | CaPRR1 | 0.5458 | 1.5912 | 0.343011564 | MRR10  | MRR58  | 0.172  | 0.5771 | 0.298041934 |
| CaRR12 | CaRR3  | 0.1686 | 0.7857 | 0.21458572  | MRR11  | MRR33  | 0.1866 | 0.5605 | 0.332917038 |
| CaRR13 | CaRR15 | 0.3612 | 1.0141 | 0.356177892 | MRR14  | MRR32  | 0.1597 | 0.9564 | 0.166980343 |
| CaRR18 | CaRR14 | 0.2016 | 0.8833 | 0.228235028 | MRR15  | MRR60  | 0.2222 | 0.609  | 0.364860427 |
| CaRR25 | CaRR21 | 0.1572 | 0.5749 | 0.273438859 | MRR17  | MRR56  | 0.7303 | 1.6914 | 0.431772496 |
|        |        |        |        |             | MRR17  | MRR54  | 0.5935 | 1.5411 | 0.385114529 |
|        |        |        |        |             | MRR2   | MRR35  | 0.5972 | 1.6431 | 0.363459315 |
|        |        |        |        |             | MRR31  | MRR39  | 0.1808 | 0.5867 | 0.308164309 |
|        |        |        |        |             | MRR32  | MRR40  | 0.3523 | 1.7214 | 0.204658998 |
|        |        |        |        |             | MRR54  | MRR56  | 0.4135 | 0.8055 | 0.513345748 |
|        |        |        |        |             | MRR6   | MRR29  | 0.5169 | 2.1639 | 0.238874255 |
|        |        |        |        |             | MRR7   | MRR34  | 0.1866 | 0.8556 | 0.218092567 |

| Cc_TCS | Cc_TCS | Ka     | Ks     | Ka/Ks       |
|--------|--------|--------|--------|-------------|
| CcHK20 | CcRR32 | 0.1363 | 0.6408 | 0.212702871 |
| CcHK20 | CcHK6  | 0.32   | 1.7609 | 0.181725254 |
| CcHP8  | CcHP2  | 0.2964 | -1     | -0.2964     |
| CcRR21 | CcRR1  | 0.0836 | 0.5071 | 0.164859002 |
| CcRR37 | CcRR6  | 0.2176 | 0.7925 | 0.274574132 |
| CcRR8  | CcRR12 | 0.1039 | 0.7482 | 0.138866613 |

Ca

Mt

Ca

Mt

Mean of Ka and Ks values

|                    |          |
|--------------------|----------|
| Mean Ka_values HKS | 0.16345  |
| Mean Ka_values RRS | 0.28688  |
| Mean Ka_values HKS | 0.15086  |
| Mean Ka_values RRS | 0.352686 |
| Mean Ks_values HKS | 0.954633 |
| Mean Ks_values RRS | 0.96984  |
| Mean Ks_values HKS | 0.76496  |
| Mean Ks_values RRS | 1.131864 |

Ratio of Ka and Ks values RRs Vs HKS

|                  |          |
|------------------|----------|
| Ca_Ka ratios     |          |
| Ka_RRS/Ka_HKS    | 1.755154 |
| Mt_Ka ratios     |          |
| Mt_Ka_RRS/Ka_HKS | 2.337835 |
| Ca_Ks ratios     |          |
| Ca_Ks_RRS/Ks_HKS | 1.015929 |
| Mt_Ks ratios     |          |
| Mt_Ks_RRS/Ks_HKS | 1.479639 |



|        |                 |        |        |             |
|--------|-----------------|--------|--------|-------------|
| CaRR12 | Glyma.04G177900 | 0.1785 | 0.4579 | 0.389823105 |
| CaRR12 | Glyma.02G027400 | 0.3698 | 0.4674 | 0.79118528  |
| CaRR12 | Glyma.01G037500 | 0.3627 | 0.4685 | 0.773105656 |
| CaRR13 | Glyma.17G217100 | 0.2252 | 0.5029 | 0.447802744 |
| CaRR13 | Glyma.14G110600 | 0.2326 | 0.5036 | 0.461874504 |
| CaRR13 | Glyma.06G063500 | 0.1597 | 0.5231 | 0.305295355 |
| CaRR13 | Glyma.04G062500 | 0.1558 | 0.5601 | 0.278164613 |
| CaRR14 | Glyma.17G030600 | 0.1755 | 0.8558 | 0.205071278 |
| CaRR14 | Glyma.15G145200 | 0.1647 | 0.9407 | 0.175082385 |
| CaRR14 | Glyma.09G040000 | 0.1699 | 1.7179 | 0.09889982  |
| CaRR14 | Glyma.07G243300 | 0.1717 | 2.0549 | 0.083556377 |
| CaRR15 | Glyma.17G217100 | 0.2077 | 0.6037 | 0.344045055 |
| CaRR15 | Glyma.14G110600 | 0.2054 | 0.6046 | 0.339728746 |
| CaRR15 | Glyma.06G063500 | 0.2836 | 0.6405 | 0.442779079 |
| CaRR15 | Glyma.04G062500 | 0.2481 | 0.6415 | 0.386749805 |
| CaRR16 | Glyma.07G171200 | 0.1543 | 0.6374 | 0.242077189 |
| CaRR16 | Glyma.02G085900 | 0.1421 | 0.65   | 0.218615385 |
| CaRR17 | Glyma.18G010800 | 0.1301 | 0.4977 | 0.261402451 |
| CaRR17 | Glyma.11G246400 | 0.1223 | 0.5119 | 0.23891385  |
| CaRR17 | Glyma.08G100900 | 0.1853 | 0.5124 | 0.361631538 |
| CaRR17 | Glyma.05G144500 | 0.1698 | 0.5356 | 0.317027633 |
| CaRR18 | Glyma.17G030600 | 0.0817 | 0      |             |
| CaRR18 | Glyma.15G145200 | 0.1557 | 0.3842 | 0.405257678 |
| CaRR18 | Glyma.09G040000 | 0.1561 | 0.4215 | 0.370344009 |
| CaRR18 | Glyma.07G243300 | 0.0784 | 0.4367 | 0.17952828  |
| CaRR19 | Glyma.17G076000 | 0.2287 | 0      |             |
| CaRR19 | Glyma.13G155400 | 0.25   | 0.4047 | 0.617741537 |
| CaRR21 | Glyma.17G152800 | 0.1581 | 0.5334 | 0.29640045  |
| CaRR21 | Glyma.11G041300 | 0.101  | 0      |             |
| CaRR21 | Glyma.05G070200 | 0.1599 | 0      |             |
| CaRR21 | Glyma.01G200800 | 0.1061 | 0      |             |
| CaRR25 | Glyma.17G152800 | 0.1401 | 0.3075 | 0.455609756 |
| CaRR25 | Glyma.11G041300 | 0.1584 | 0.4153 | 0.381411028 |
| CaRR25 | Glyma.05G070200 | 0.1292 | 0.441  | 0.292970522 |
| CaRR25 | Glyma.01G200800 | 0.157  | 0.4697 | 0.334255908 |
| CaRR3  | Glyma.18G130900 | 0.425  | 0.4962 | 0.856509472 |
| CaRR3  | Glyma.17G093900 | 0.1819 | 0.5018 | 0.362495018 |
| CaRR3  | Glyma.08G292400 | 0.4023 | 0.5196 | 0.774249423 |
| CaRR3  | Glyma.06G187000 | 0.0993 | 0.5308 | 0.187076112 |
| CaRR3  | Glyma.05G033000 | 0.1813 | 0.5401 | 0.335678578 |
| CaRR3  | Glyma.04G177900 | 0.0953 | 0.5487 | 0.173683251 |
| CaRR3  | Glyma.02G027400 | 0.3101 | 0.5725 | 0.541659389 |
| CaRR3  | Glyma.01G037500 | 0.3371 | 0.5766 | 0.584634062 |
| CaRR31 | Glyma.19G169700 | 0.2857 | 0.7022 | 0.406864141 |
| CaRR32 | Glyma.19G171300 | 0.1952 | 0.6999 | 0.278896985 |
| CaRR32 | Glyma.03G170100 | 0.1382 | 0.7905 | 0.174826059 |
| CaRR4  | Glyma.06G114900 | 0.1332 | 0.5345 | 0.249204864 |
| CaRR4  | Glyma.04G247800 | 0.1305 | 0.5526 | 0.236156352 |
| CaRR5  | Glyma.02G027400 | 0.1449 | 0.488  | 0.29692623  |
| CaRR5  | Glyma.01G037500 | 0.1096 | 0.4901 | 0.223627831 |
| CaRR6  | Glyma.15G236200 | 0.0684 | 0.3526 | 0.193987521 |
| CaRR6  | Glyma.13G197600 | 0.0724 | 0.4108 | 0.17624148  |
| CaRR6  | Glyma.11G155100 | 0.1151 | 0.4129 | 0.27875999  |
| CaRR6  | Glyma.04G137600 | 0.1357 | 0.4556 | 0.29784899  |
| CaRR9  | Glyma.06G142300 | 0.0506 | 0.5329 | 0.094952149 |
| CaRR9  | Glyma.04G223000 | 0.0573 | 0.5521 | 0.103785546 |



|        |                 |        |        |
|--------|-----------------|--------|--------|
| MTRR60 | Glyma.11G246400 | 0.1947 | 0.6063 |
| MTRR60 | Glyma.08G109900 | 0.1412 | 0.4183 |
| MTRR60 | Glyma.05G144500 | 0.1339 | 0.4161 |
| MTRR7  | Glyma.17G030600 | 0.1815 | 0.6728 |
| MTRR7  | Glyma.15G145200 | 0.1521 | 0.5421 |
| MTRR7  | Glyma.09G040000 | 0.1489 | 0.5045 |
| MTRR7  | Glyma.07G243300 | 0.1723 | 0.6811 |





Supplemental Table 5: A list of orthologous pairs in legumes with Arabidopsis

| Ca_TCS | At_TCS    | Ka     | Ks     | Ka/Ks       | Mt_TCS | At_TCS    | Ka     | Ks     | Ka/Ks       | Cc_TCS | At_TCS    | Ka     | Ks     | Ka/Ks       |
|--------|-----------|--------|--------|-------------|--------|-----------|--------|--------|-------------|--------|-----------|--------|--------|-------------|
| CaHK1  | AT1G09570 | 0.1793 | 1.8228 | 0.098365153 | MtHK1  | AT5G10680 | 0.436  | 1.8211 | 0.239415738 | CcHK1  | AT1G27320 | 0.2017 | 2.0543 | 0.098184296 |
| CaHK10 | AT2G17820 | 0.2659 | 2.5319 | 0.105019945 | MtHK12 | AT1G27320 | 0.2195 | 2.1254 | 0.103274678 | CcHK20 | AT3G04580 | 0.272  | 0      |             |
| CaHK13 | AT1G04310 | 0.4502 | 2.6286 | 0.171269878 | MtHK13 | AT5G10680 | 0.584  | 0      |             | CcHK3  | AT2G17820 | 0.225  | 1.8126 | 0.124131082 |
| CaHK14 | AT5G35750 | 0.3246 | 1.8005 | 0.180283255 | MtHK15 | AT2G17820 | 0.2597 | 1.6712 | 0.155397319 | CcHK6  | AT3G23150 | 0.2627 | 0      |             |
| CaHK15 | AT2G47430 | 0.4869 | 2.4451 | 0.19913296  | MtHK19 | AT2G17820 | 0.2679 | 2.6509 | 0.101060017 | CcHK7  | AT2G01830 | 0.2141 | 2.1728 | 0.098536451 |
| CaHK16 | AT1G09570 | 0.1329 | 2.1955 | 0.060532908 | MtHK20 | AT1G27320 | 0.2106 | 2.1406 | 0.098383631 | CcHP2  | AT1G03430 | 0.3769 | 0      |             |
| CaHK18 | AT1G27320 | 0.2152 | 1.7702 | 0.121568184 | MtHK21 | AT2G01830 | 0.2076 | 2.1336 | 0.097300337 | CcRR16 | AT3G04280 | 0.7306 | 3.036  | 0.240645586 |
| CaHK19 | AT2G01830 | 0.2111 | 2.6824 | 0.078698181 | MtHK3  | AT3G23150 | 0.338  | 2.3487 | 0.143909397 | CcRR20 | AT5G02810 | 0.4791 | 2.5736 | 0.186159465 |
| CaHK3  | AT2G17820 | 0.2564 | 1.7399 | 0.147364791 | MtHK3  | AT1G04310 | 0.4136 | 0      |             | CcRR20 | AT5G60100 | 0.4062 | 1.8963 | 0.214206613 |
| CaHK4  | AT5G10680 | 0.4402 | 2.4218 | 0.181765629 | MtHK4  | AT3G23150 | 0.2834 | 3.0562 | 0.092729533 | CcRR23 | AT4G00760 | 1.0073 | 1.7352 | 0.580509451 |
| CaHK5  | AT3G23150 | 0.2727 | 3.8381 | 0.07105078  | MtHK4  | AT1G04310 | 0.3969 | 2.6812 | 0.148030733 | CcRR34 | AT4G00760 | 1.0425 | 1.5547 | 0.670547372 |
| CaHK5  | AT1G04310 | 0.388  | 2.6886 | 0.144313025 | MtHK5  | AT3G04580 | 0.2931 | 1.5412 | 0.190176486 | CcRR34 | AT2G46790 | 0.5414 | 1.9751 | 0.274112703 |
| CaHK6  | AT3G04580 | 0.2835 | 1.6089 | 0.176207347 | MtHK6  | AT1G09570 | 0.1334 | 2.5763 | 0.051779684 | CcRR9  | AT4G18020 | 0.4329 | 3.3488 | 0.129270186 |
| CaHK7  | AT1G27320 | 0.2108 | 2.0551 | 0.102574084 | MtHK7  | AT2G47430 | 0.6035 | 2.8047 | 0.215174528 |        |           |        |        |             |
| CaHK8  | AT5G10680 | 0.5131 | 2.3445 | 0.218852634 | Mt-HP2 | AT1G03430 | 0.3648 | 0      |             |        |           |        |        |             |
| CaPRR3 | AT2G46790 | 0.5869 | 2.0003 | 0.293405989 | Mt-HP4 | AT3G16360 | 0.2156 | 1.2793 | 0.168529665 |        |           |        |        |             |
| CaPRR4 | AT5G61380 | 0.3448 | 2.046  | 0.168523949 | Mt-HP6 | AT1G80100 | 0.1472 | 0      |             |        |           |        |        |             |
| CaPRR5 | AT5G02810 | 0.5152 | 3.2443 | 0.15880159  | MtRR17 | AT2G46790 | 0.5188 | 2.4481 | 0.211919448 |        |           |        |        |             |
| CaPRR5 | AT5G60100 | 0.5645 | 2.203  | 0.256241489 | MtRR29 | AT5G60100 | 0.4033 | 1.604  | 0.251433915 |        |           |        |        |             |
| CaRR11 | AT1G68210 | 0.87   | 1.3104 | 0.663919414 | MtRR33 | AT5G61380 | 0.3957 | 1.7082 | 0.231647348 |        |           |        |        |             |
|        |           |        |        |             | MtRR54 | AT4G00760 | 1.1118 | 2.9816 | 0.372887041 |        |           |        |        |             |
|        |           |        |        |             | MtRR54 | AT2G46790 | 0.5403 | 2.5478 | 0.212065311 |        |           |        |        |             |
|        |           |        |        |             | MtRR56 | AT4G00760 | 1.0004 | 2.7112 | 0.368987902 |        |           |        |        |             |
|        |           |        |        |             | MtRR56 | AT2G46790 | 0.5758 | 2.3597 | 0.24401407  |        |           |        |        |             |
|        |           |        |        |             | MtRR6  | AT5G60100 | 0.4626 | 2.4443 | 0.189256638 |        |           |        |        |             |
|        |           |        |        |             | MtRR6  | AT5G02810 | 0.377  | 2.0548 | 0.183472844 |        |           |        |        |             |

**Supplemental Table 6: The ratio of total genes and TCS gene in *Medicago-C. cajan*, *Medicago-chickpea* and chickpea-*C. cajan***

| <b>Organism</b>             | <b>Total number of genes</b> |              | <b>Gene Ratio</b> | <b>TCS Ratio</b> |
|-----------------------------|------------------------------|--------------|-------------------|------------------|
| <b>Chickpea (Ca)</b>        | 50894                        | <b>Mt/Cc</b> | 1.27              | 1.28             |
| <b><i>Medicago</i> (Mt)</b> | 40071                        | <b>Mt/Ca</b> | 1.8               | 1.43             |
| <b><i>C. cajan</i> (Cc)</b> | 28269                        | <b>Cc/Ca</b> | 1.41              | 1.11             |
